# Supplementary material
Source: HighWire-hosted journal article supplement (https://bmjopen.bmj.com/content/12/5/e055599)
Supplement: inline-supplementary-material-1 [file inline-supplementary-material-1.pdf]

**Supplemental appendix 1:** Interview guide questions asked of parents and healthcare professionals.

| <b>Parents</b>                                                                                                                                                                                                                                                                                                                                                                                                                                                                                                                                                                                                                                                                                                                                                                                                                                                                      | <b>Healthcare professionals</b>                                                                                                                                                                                                                                                                                                                                                                                                                                                                                                                                                                                                                                                                                                                                                                                                                                   |
|-------------------------------------------------------------------------------------------------------------------------------------------------------------------------------------------------------------------------------------------------------------------------------------------------------------------------------------------------------------------------------------------------------------------------------------------------------------------------------------------------------------------------------------------------------------------------------------------------------------------------------------------------------------------------------------------------------------------------------------------------------------------------------------------------------------------------------------------------------------------------------------|-------------------------------------------------------------------------------------------------------------------------------------------------------------------------------------------------------------------------------------------------------------------------------------------------------------------------------------------------------------------------------------------------------------------------------------------------------------------------------------------------------------------------------------------------------------------------------------------------------------------------------------------------------------------------------------------------------------------------------------------------------------------------------------------------------------------------------------------------------------------|
| <ul style="list-style-type: none"> <li>- In your experience, what readiness did you need before your child's resuscitation?</li> <li>- How were you treated before your child's resuscitation?</li> <li>- What actions helped you become ready for and endure your child's resuscitation?</li> <li>- In your experience, what barriers were there to your readiness for your child's resuscitation?</li> <li>- What factors do you think would have improved your readiness for your child's resuscitation?</li> <li>- Which health professionals could better help you to become ready for this critical situation? And how could they help?</li> <li>- In your experience, how can the health professionals ready, or prepare, other parents for resuscitation?</li> <li>- What suggestions do you have to improve parents' readiness for their child's resuscitation?</li> </ul> | <ul style="list-style-type: none"> <li>- In your experience, what preparation do parents need before their child's resuscitation?</li> <li>- How do you treat parents to help promote their readiness before their child's resuscitation?</li> <li>- What actions do you take to help parents prepare for and endure the resuscitation of their child?</li> <li>- In your experience, what barriers there are to readying parents for their child's resuscitation?</li> <li>- What do you think are the factors that helped improve parents' readiness for their child's resuscitation?</li> <li>- In your experience, how can parental readiness for their child's resuscitation lead to better parenting experiences?</li> <li>- Which health professionals could better help parents to ready for this critical situation? And how could they help?</li> </ul> |
